# Supplementary material for: Musashi-2 controls cell fate, lineage bias, and TGF-β signaling in HSCs
Source: PubMed Central journal article supplement — J Exp Med. 2014 Jan 13;211(1):71–87. doi: 10.1084/jem.20130736 (PMC3892968; doi:10.1084/jem.20130736), 2014-01-13
Supplement: supp_jem.20130736_JEM_20130736_sm.pdf [file supp_jem.20130736_JEM_20130736_sm.pdf]

SUPPLEMENTAL MATERIAL

Park et al., <http://www.jem.org/cgi/content/full/jem.20130736/DC1>

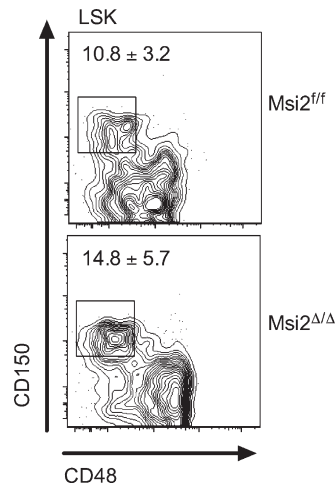

Figure S1. Gating strategy for Fig. 1 g. Frequencies of LSK<sup>+</sup>CD150<sup>+</sup>CD48<sup>-</sup> with SEM.

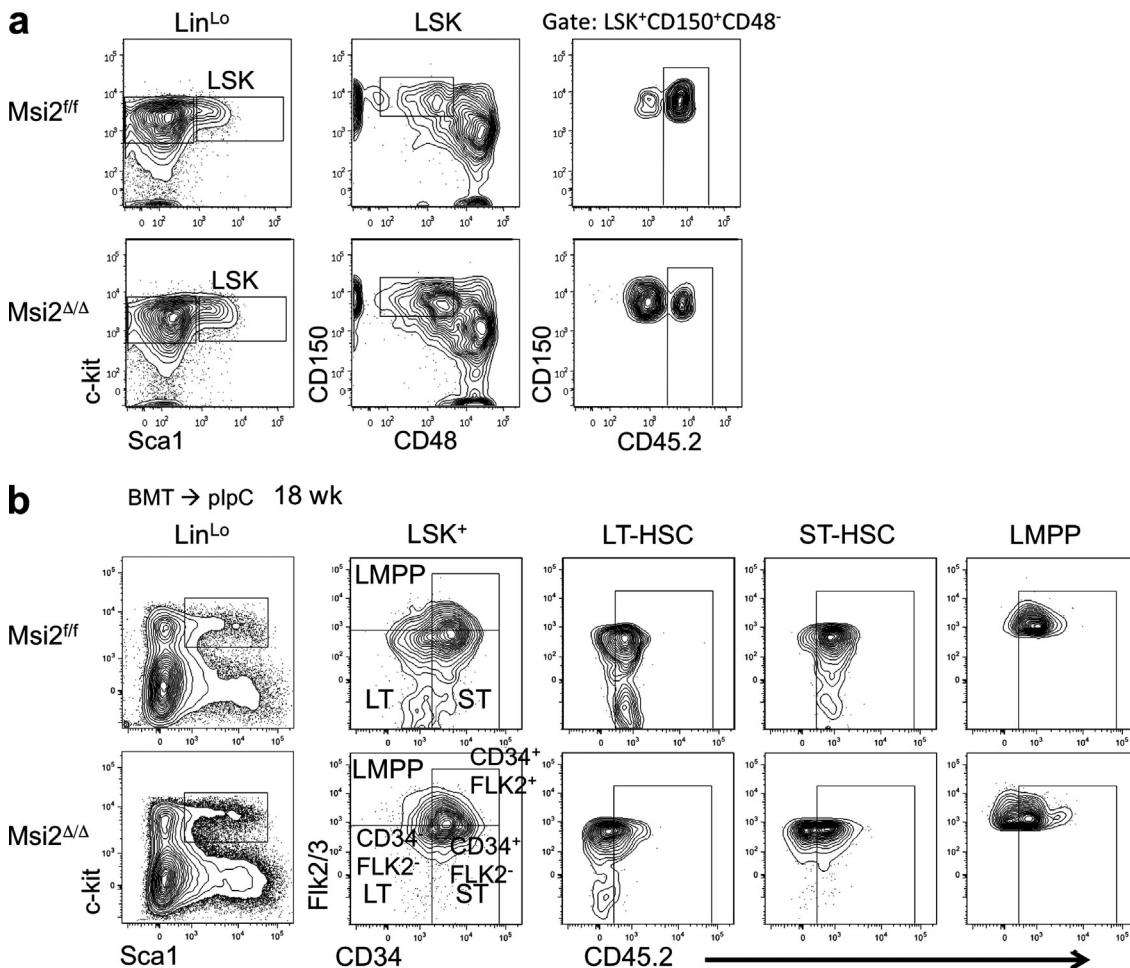

Figure S2. Gating strategy for Fig. 2. (a) Gating strategy for Fig. 2 (b and c). (b) Gating strategy for Fig. 2 g. BMT, BM transplant.

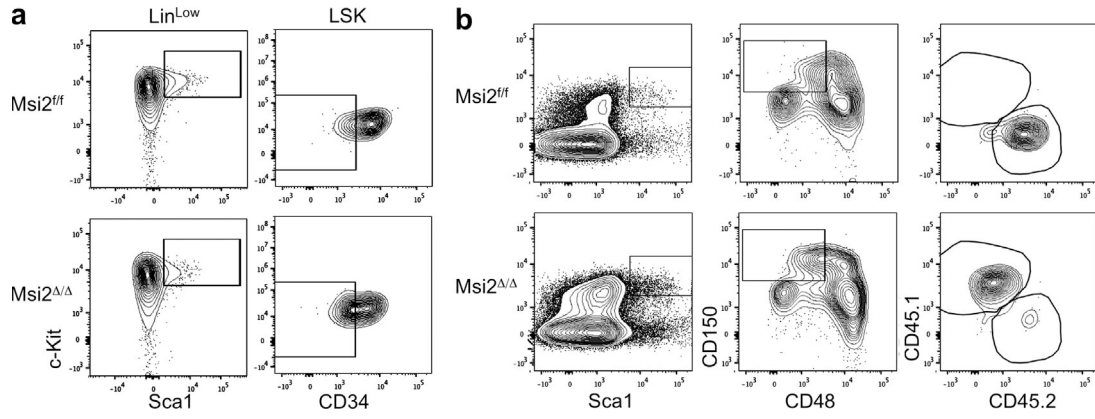

Figure S3. Gating strategy for Fig. 3. (a) Gating strategy for Fig. 3 a. (b) Gating strategy for Fig. 3 c.

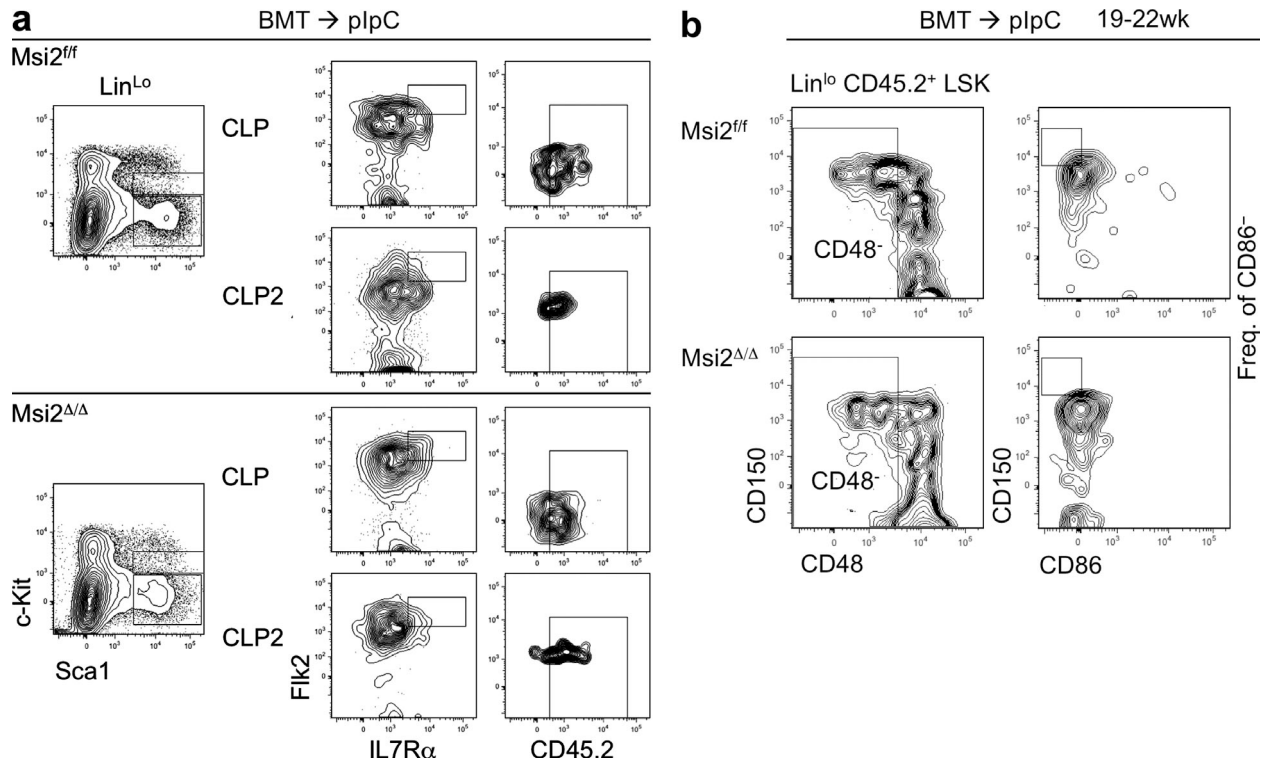

Figure S4. Gating strategy for Fig. 4. (a) Gating strategy for Fig. 4 d. (b) Gating strategy for Fig. 4 f. BMT, BM transplant.

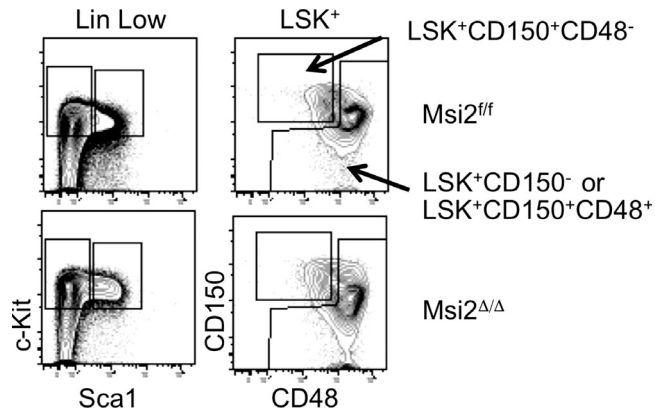

Figure S5. Gating strategy for Fig. 5 (a and e).

Table S1, included as a separate Excel file, shows microarray analysis of the differentially expressed genes in *Msi2*-deficient LSK cells.

Table S2, included as a separate Excel file, lists the additional curated gene sets utilized in GSEA analyses.

Table S3, included as a separate Excel file, lists the statistically significant gene sets from *Msi2*-deficient LSK microarray expression analysis.

Table S4, included as a separate Excel file, shows the location and number of the significant HITS-CLIP targets.

Table S5, included as a separate Excel file, lists the statistically significant gene sets from the HITS-CLIP ranked list in K562 cells.

Table S6, included as a separate Excel file, lists the significant and overlapping gene sets from the HITS-CLIP and microarray analyses.

The supplemental dataset, included as a separate Excel file, shows primer sequences used for the qRT-PCR experiments.
